# Supplementary material
Source: PubMed Central journal article supplement (PMC3612507)
Supplement: NIHMS271653-supplement-Sup_Fig_1.pdf [file NIHMS271653-supplement-Sup_Fig_1.pdf]

| Recognized protein                             | FITC | PE  | PerCP | APC | Other   |
|------------------------------------------------|------|-----|-------|-----|---------|
| CCR7 (CD197)                                   | BD   |     |       |     |         |
| CCR5 (CD195)                                   |      | BD  |       |     |         |
| CCR2 (CD192)                                   |      | R&D |       |     |         |
| CXCR1                                          |      |     |       | BD  |         |
| CXCR3                                          |      | BD  |       |     |         |
| CD4                                            |      |     |       | BD  |         |
| CD8                                            |      |     | BD    |     |         |
| CD45                                           |      | BD  |       |     |         |
| CD3                                            |      | BD  |       |     |         |
| F(ab') <sub>2</sub> -biotin (goat anti-mouse)* |      |     |       |     | Jl      |
| Streptavidin*                                  |      | BD  |       |     |         |
| Comp Beads (anti-mouse)                        |      |     |       |     | BD      |
| Mesothelin (CAK1) (mouse anti-human)**         |      |     |       |     | Covance |
| Mouse IgG**                                    |      | BD  |       |     |         |

**Sup Fig. 1. Antibodies in this study were acquired from BD PharMingen (BD; San Diego, CA), R&D Systems (R&D; Minneapolis, MN), Jackson ImmunoResearch Laboratories (Jl; West Grove, PA), and Covance (Princeton, NJ)**

**\*for FACS detection of mesoCAR, \*\*for FACS detection of mesothelin**
