# Supplementary material
Source: PubMed Central journal article supplement (PMC3612507)
Supplement: NIHMS271653-supplement-Sup_Fig_2.pdf [file NIHMS271653-supplement-Sup_Fig_2.pdf]

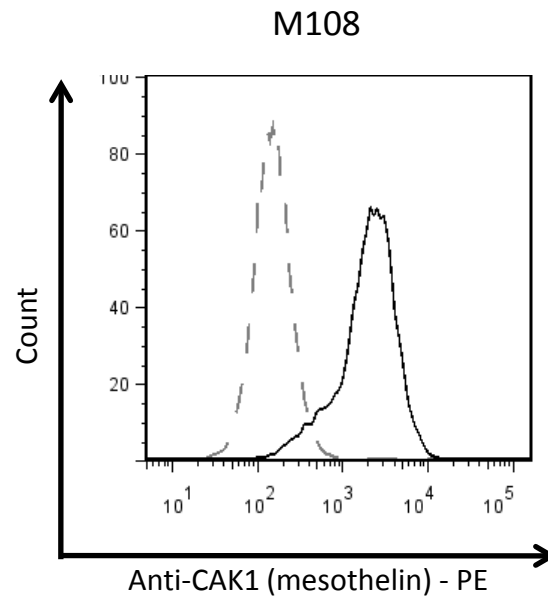

**Supplemental Figure 2: M108 naturally expresses the mesothelin antigen. Isotype stain (hatched histogram), CAK1 stain (solid histogram).**
