# Supplementary material
Source: PubMed Central journal article supplement (PMC3612507)

**Supplemental Figure 3: FACS plots revealing low expression of CCR2 among samples from the three different T cell types. (Quadrant percentages are of total cells gated on forward vs. side-scatter dot plot.)**

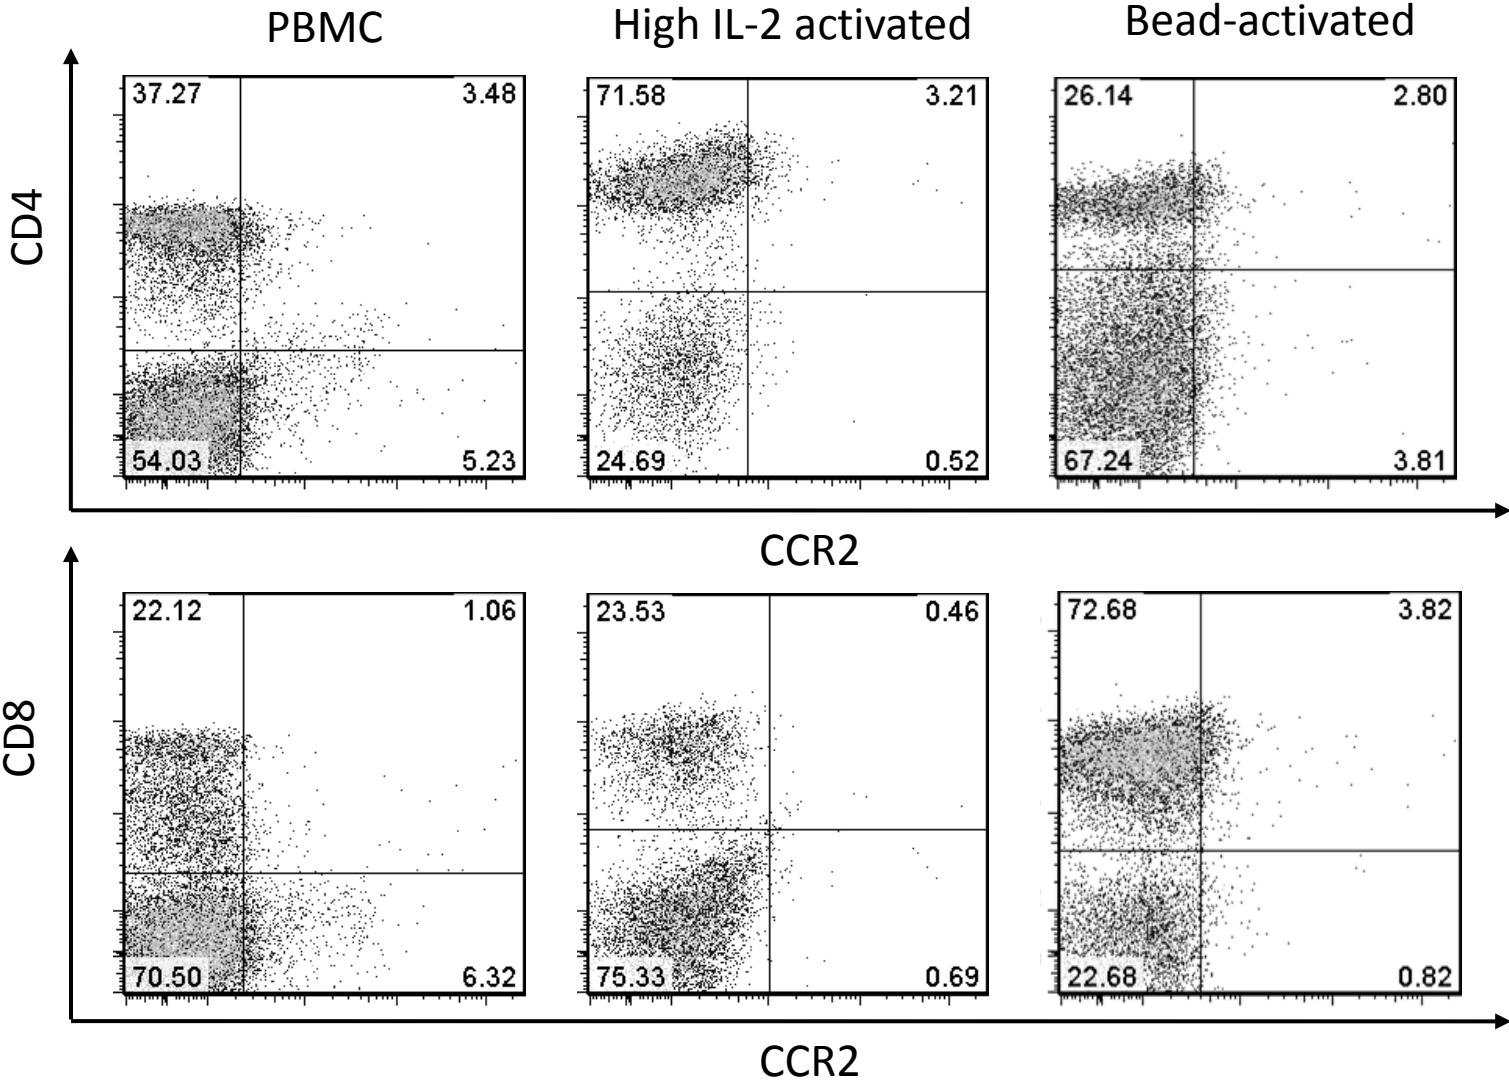

Supplement: NIHMS271653-supplement-Sup_Fig_3.pdf [file NIHMS271653-supplement-Sup_Fig_3.pdf]
